# Supplementary material
Source: PubMed Central journal article supplement (PMC3157736)
Supplement: oncotarget-01-710-s001.pdf [file oncotarget-01-710-s001.pdf]

**Supplemental Table S1a.** Table of deregulated miRNAs in GBM that potentially regulate EZH2. A selection of miRNAs expressed in the brain was analyzed for its differential expression in non-neoplastic brain (NNB) and glioblastoma (GBM) tissues, using qRT-PCR (Applied Biosystems, according the manufacturer's protocol) [45]. miRNAs that were found to be differentially expressed in GBM (GBM/NNB ratio <0.65 or >1.70) and are predicted to target the EZH2 3'-UTR are indicated.

| miRNA      | Fold change (GBM/NNB) |      |
|------------|-----------------------|------|
| miR-21     | 4.997136              | Up   |
| miR-16     | 0.667656              |      |
| miR-15b    | 1.998466              | Up   |
| miR-15a    | 1.507183              |      |
| miR-92     | 2.505202              | Up   |
| miR-19a    | 1.474438              |      |
| miR-19b    | 0.587649              | Down |
| miR-17-5p  | 3.680952              | Up   |
| miR-128a   | 0.655279              |      |
| miR-7      | 0.071265              | Down |
| miR-1      | 0.256097              | Down |
| miR-29a    | 0.5813                | Down |
| miR-29b    | 0.523982              | Down |
| miR-29c    | 1.165094              |      |
| miR-134    | 0.286395              | Down |
| miR-30a-5p | 0.287311              | Down |
| miR-22     | 0.243365              | Down |
| miR-96     | 1.631808              |      |
| miR-182*   | 1.807229              | Up   |
| miR-183    | 37.37386              | Up   |
| miR-219    | 0.016776              | Down |
| miR-139    | 0.00975               | Down |
| miR-330    | 0.02896               | Down |
| miR-124a   | 0.02607               | Down |

| miRNA      | Fold change (GBM/NNB) |      |
|------------|-----------------------|------|
| miR-338    | 0.193976              | Down |
| miR485-5p  | 0.030904              | Down |
| miR-181a   | 0.008061              | Down |
| miR-20     | 1.451454              |      |
| miR-98     | 0.527855              | Down |
| miR-200a   | 0.226573              | Down |
| miR-324-3p | 0.0587                | Down |
| miR-378    | 0.246587              | Down |
| miR-103    | 0.018079              | Down |
| miR-467    | 1.03631               |      |
| miR-521    | 1                     |      |
| miR-126*   | 0.350301              | Down |
| miR-155    | 1.153513              |      |
| miR-137    | 0.00616               | Down |
| miR-30d    | 0.064749              | Down |
| miR-135a   | 0.051153              | Down |
| miR-101    | 0.601473              | Down |
