# Supplementary material
Source: PubMed Central journal article supplement (PMC3157736)
Supplement: oncotarget-01-710-s002.pdf [file oncotarget-01-710-s002.pdf]

|                  |         |     |     |                                                                                        |   |   |      |
|------------------|---------|-----|-----|----------------------------------------------------------------------------------------|---|---|------|
| hsa-miR-150*     | 17,1692 | 176 | 197 | gacaggggguCCGGACAUGGUC<br>  :      <br>gctgcaaagtGTTTGTACCAG<br>uuguuauguUGAAUGAUGGAGu | 2 | 1 |      |
| hsa-miR-98       | 17,1692 | 1   | 14  | :      <br>-----cATCTGCTACCTCc<br>gaguaggcuACA-UGUUUUAAA                               | 1 | 1 | Down |
| hsa-miR-944      | 17,0555 | 109 | 131 | <br>gcaaagtactGTAAGAATAATTT<br>uggauaggacUUAUUGAACUU                                   | 7 | 1 |      |
| hsa-miR-26b      | 17,0319 | 237 | 257 | :        <br>tttgaataaaGAATACTTGAA<br>UGUGUGGUCCUUAUUAAGAGg                            | 7 | 1 |      |
| hsa-miR-539      | 16,9418 | 213 | 234 | ::    :           <br>ATGCAGTATGGTACATTTTTCa<br>cGGAGUCUCCGUCGACGaa                    | 4 | 1 |      |
| hsa-miR-646      | 16,8821 | 22  | 40  | <br>tCCTCTGAAACAGCTGCct<br>CUUUUUGCGGGGACCGAACUUU                                      | 3 | 1 |      |
| hsa-miR-498      | 16,8566 | 76  | 98  | :      <br>GAAAAAGAACATGCAGTTTGA<br>ACGUUACGUUGAUGUUACGUg                              | 5 | 1 |      |
| hsa-miR-33a      | 16,8033 | 198 | 218 | :        <br>TGAATTTTGCATAATGCag<br>AGAGACGUC--CGGCACACGAAACG                          | 6 | 1 |      |
| hsa-miR-330-3p   | 16,7435 | 168 | 192 | <br>TCTCACCAGCTGCAAAGTGT<br>cgCCUUGAAUC-GGUGACACUU                                     | 4 | 1 |      |
| hsa-miR-27a      | 16,6889 | 47  | 68  | :      <br>caGGAACCTCGAGTACTGTGGG<br>gccGGACUAA--GUGUUGUGUCGA                          | 6 | 1 |      |
| hsa-miR-138      | 16,6303 | 154 | 178 | :        :      <br>actTTTATTGCCTTCTCACCAGCT<br>gucUGGGUUAUCUUCGUCGAAc                 | 8 | 1 |      |
| hsa-miR-99a*     | 16,6007 | 125 | 146 | :::      :    <br>ataATTATAGTAATGAGTTa<br>gauggaCGUGAUUUCGUGAAAU                       | 2 | 1 |      |
| hsa-miR-20a      | 16,5172 | 53  | 75  | :     :           <br>cctcgaGTACTGTGGCAATTTA<br>gccCUGCAGGUCUGAGUUGAGA                 | 5 | 1 |      |
| hsa-miR-219-1-3p | 16,487  | 137 | 158 | :        <br>aatGAGTTAAAAATCACTTT<br>uuuAGUCGUACGGUCCUUGGGu                            | 2 | 2 |      |
| hsa-miR-23b*     | 16,487  | 37  | 56  | :           <br>gccTTAGCTT--CAGGAACCTc<br>uagaCGUGACAGUCGUGAAAU                        | 2 | 1 |      |
| hsa-miR-106b     | 16,4603 | 55  | 75  | :        :           <br>tcgaGTACTGTGGCAATTTA<br>uUUCUCUGGCCAAGUGACACU                 | 5 | 1 |      |
| hsa-miR-128a     | 16,4603 | 47  | 67  | :      :      <br>cAGGAACCTCGAGTACTGTGG<br>GUACUGACCGUGAUUAGACUUAu                     | 6 | 1 |      |
| hsa-miR-871      | 16,4041 | 85  | 107 | :        <br>CATGCAGTTTGAATCTGAATt<br>GCUUAGGUGGUCUUGUGAAg                             | 5 | 1 |      |
| hsa-miR-382      | 16,3733 | 56  | 75  | :        <br>CGAGT--ACTGTGGCAATTTa<br>cgUCUUGAAUC-GGUGACACUU                           | 1 | 2 |      |
| hsa-miR-27b      | 16,346  | 47  | 68  | :        :      <br>caGGAACCTCGAGTACTGTGGG<br>CGUUACGUUGUCGUUACGUg                     | 6 | 1 |      |
| hsa-miR-33b      | 16,3227 | 199 | 218 | :          <br>GAATTTTGCATAATGCag<br>agucaaAGGAGACGUUUGUCaa                            | 6 | 1 |      |
| hsa-miR-452      | 16,2596 | 16  | 36  | <br>ccccccTCCTCTG-AAACAGct<br>gccUGGUGUCUGUCUCGAAc                                     | 1 | 1 |      |
| hsa-miR-99b*     | 16,2596 | 125 | 146 | :::   :   :    <br>ataATTATAGTAATGAGTTa<br>caagacaggaccUUCUUGUAUGa                     | 2 | 1 |      |
| hsa-miR-567      | 16,1778 | 68  | 90  | :  <br>gcaatttagaaaAAGAACATGCa<br>uugACAUGUUUGAUGAUGGAGU                               | 1 | 1 |      |
| hsa-let-7g       | 16,1459 | 22  | 42  | :      :      <br>tcCTCTG-AAACAGCTGCCTTA                                               | 6 | 2 |      |

|                  |         |     |     |                                                                                                 |   |   |      |
|------------------|---------|-----|-----|-------------------------------------------------------------------------------------------------|---|---|------|
| hsa-miR-199a-3p  | 16,1459 | 99  | 120 | auuggUUACACGUCUGAUGACA<br>               <br>ttctgAATTTGCAAAGTACTGT<br>gcACG-UUCAUUG-GUUCUUUucc | 5 | 1 |      |
| hsa-miR-26a-1*   | 16,1459 | 106 | 129 | : :      <br>ttTGCAAAGTACTGTAAGAATAat<br>cuuugUUCAUUA-GUUCUUUucc                                | 1 | 1 |      |
| hsa-miR-26a-2*   | 16,1459 | 107 | 129 | :      <br>ttgcaAAGTACTGTAAGAATAat<br>CGUUUUCAUUAACGGUCAAAac                                    | 1 | 2 |      |
| hsa-miR-548a-3p  | 16,0322 | 76  | 96* | <br>GAAAAAGAACATG-CAGTTTga<br>gacgUGAAAAUACUUUUCGAG                                             | 5 | 1 |      |
| hsa-miR-590-5p   | 16,0322 | 124 | 145 | :         :   :   :<br>aataATTATAGTAATGAGTTT<br>uugucgugUUUGAUGAUGGAGU                          | 5 | 1 |      |
| hsa-let-7i       | 15,9185 | 21  | 42  | :   :   :   :  <br>ctcctctgAAACAGCTGCCTTA<br>cuUUGUUCAUUGUUUUUucc                               | 6 | 1 |      |
| hsa-miR-26a-2*   | 15,9185 | 232 | 253 | <br>tcAACTTTGAATAAAGAATAct<br>gAUGCGCAUAGAUAUCGUUUUU                                            | 1 | 2 |      |
| hsa-miR-137      | 15,8384 | 119 | 141 | :     :   :   :  <br>gTAAGAATAATTTATAGTAATGA<br>agguuagucaaggacUACGUCAu                         | 6 | 2 | Down |
| hsa-miR-217      | 15,8384 | 71  | 93  | <br>atttagaaaaagaacATGCAGTt<br>cgUUAGUCGAUUGAUGGACGGA                                           | 5 | 2 |      |
| hsa-miR-34c-5p   | 15,8384 | 147 | 167 | :   :   :      <br>aaAATCAACT-TTTTATTGCCT<br>auaAGGGGAUCUAUGCUUAAac                             | 5 | 1 |      |
| hsa-miR-10a*     | 15,8047 | 184 | 205 | : :     : :          <br>gtgTTTGTACCAGTGAATTTt<br>aGGUCGUGACAGGCCAUUCUac                        | 1 | 3 |      |
| hsa-miR-200a*    | 15,8047 | 105 | 126 | : :                      <br>aTTTGCAAAGTACTGTAAGAat<br>acuccccUUUCAAGAUUCAG                     | 1 | 1 |      |
| hsa-miR-625*     | 15,8047 | 116 | 137 | :              <br>actgtaaGAATAATTTATAGTa<br>AGUAGUAAUGUCCGUCUAUau                              | 1 | 1 |      |
| hsa-miR-200b     | 15,691  | 202 | 223 | :   : :   :              <br>TTTTTGCAATAATGCAGTATgg<br>GCCUGCAGGUCUGAGUUGAGA                    | 4 | 1 |      |
| hsa-miR-219-1-3p | 15,691  | 221 | 239 | :         : : :           :  <br>TGGTACATTT---TTCACTTT<br>gcUUAGUGGUGUCUUUGUAGg                 | 3 | 2 |      |
| hsa-miR-382      | 15,691  | 111 | 132 | :       :       :   :    <br>aaAGTACTGTAAGAATAATTTa<br>AGAGUGGGUCCUGUUUCUAA                     | 1 | 2 |      |
| hsa-miR-501-5p   | 15,5773 | 230 | 251 | :         :     :          <br>TTTCAACTTTGAATAAAGAATA<br>cagcuaaggCGUGCGUCUGUUAG                | 2 | 1 |      |
| hsa-miR-801      | 15,5373 | 50  | 73  | :       :           :  <br>gaacctcgaTACTGTGGCAATT<br>gAUGCGCAUAGAUAUCGUUUUU                     | 4 | 1 |      |
| hsa-miR-137      | 15,499  | 191 | 213 | : :              <br>gTACCACTGAATTTTGCATAA<br>uaaggGAUCUUA--GCUUAGACa                           | 5 | 2 | Down |
| hsa-miR-10b*     | 15,4636 | 87  | 110 | : :   :       :       :    <br>tgcagTTGAAATTCTGAATTTGc<br>auaaggggaucuAUGCUUAAAC                | 2 | 1 |      |
| hsa-miR-10a*     | 15,3499 | 88  | 109 | :              <br>gcagtttgaatTCTGAATTTG<br>cGAGGUU-UCUUUCGCGAAAC                               | 2 | 3 |      |
| hsa-miR-518d-3p  | 15,3173 | 170 | 191 | :       :   :        <br>tCACCAGCTGCAAAGTGTTTTg<br>auaagGGGAUCUAUGCUUAAAC                       | 6 | 1 |      |
| hsa-miR-10a*     | 15,1225 | 125 | 146 | : : :         :   :        <br>ataaTTTATAGTAATGAGTTTa<br>GCGUAAUAUG-AGUGCCAUGcu                 | 1 | 3 |      |
| hsa-miR-126      | 15,1225 | 206 | 228 | :             :   :          <br>TGCAATAATGCAGTATGGTACat<br>aGGUCGUU-UCUUUCGCGAAAG              | 6 | 1 |      |
| hsa-miR-518a-3p  | 14,8951 | 169 | 191 | :             :   :          <br>cTCACCAGCTGCAAAGTGTTTTg                                        | 6 | 1 |      |

|                |         |     |     |                                                                                        |   |   |      |
|----------------|---------|-----|-----|----------------------------------------------------------------------------------------|---|---|------|
| hsa-miR-518c   | 14,8202 | 169 | 191 | ugugagauuucucUUCGCGAAAC<br>   : :    <br>ctaccagctgcaAAGTGTTTG<br>GUGAGACUCCCUUCGCGAAA | 6 | 1 |      |
| hsa-miR-518e   | 14,7457 | 171 | 190 | : :    <br>CAC-CAGCTGCAAAGTGTTTT<br>ucuaacgcAAACCUGUUAGu                               | 6 | 1 |      |
| hsa-miR-219-5p | 14,6314 | 54  | 74  | :    :<br>ctcgagtactGTGGCAATTt                                                         | 2 | 1 | Down |
